# Supplementary material
Source: MDPI journal article supplement (https://www.mdpi.com/2076-3417/9/1/154)
Supplement: s1 [file s1]

# Monitoring the Activated Sludge Activities Affected by Industrial Toxins via an Early-Warning System Based on the Relative Oxygen Uptake Rate (ROUR) Index

Yu Du, Yasong Chen, Lina Zou, Songqiang Deng, Guanghe Li and Dayi Zhang

Running title: ROUR index and monitoring system for the activated sludge activities.

**Table S1.** Concentrations of toxic compounds for the laboratory ROUR system.

| Toxic Compounds  | Concentration (mg/L) |
|------------------|----------------------|
| Zn <sup>2+</sup> | 0, 10, 20, 40, 60    |
| Ni <sup>2+</sup> | 0, 10, 20, 40, 60    |
| Phenol           | 0, 10, 20, 40, 60    |

**Table S2.** Concentrations of toxic compounds for the online early-warning system.

| Toxic Compounds  | Concentration (mg/L) |
|------------------|----------------------|
| Zn <sup>2+</sup> | 0, 1, 3, 5, 8, 10    |
| Ni <sup>2+</sup> | 0, 1, 2, 3, 5, 8     |
| Cr(VI)           | 0, 5, 10, 15, 20, 40 |
| Cu <sup>2+</sup> | 0, 1, 3, 5, 8, 10    |
| Cd <sup>2+</sup> | 0, 1, 3, 5, 10, 15   |
